# Supplementary material for: Development of a Dynamic Physiologically Based Mechanistic Kidney Model to Predict Renal Clearance
Source: PubMed Central journal article supplement — CPT Pharmacometrics Syst Pharmacol. 2018 Aug 11;7(9):593–602. doi: 10.1002/psp4.12321 (PMC6157663; doi:10.1002/psp4.12321), 2018-08-11
Supplement: PSP4-7-593-s002.pdf [file PSP4-7-593-s002.pdf]

DEVELOPMENT OF A DYNAMIC PHYSIOLOGICALLY-BASED MECHANISTIC KIDNEY MODEL TO PREDICT RENAL CLEARANCE

Weize Huang, Nina Isoherranen

Table S2. Summary of physicochemical and pharmacokinetic properties of 46 test drugs

| Drug                 | Chem       | pKa (acid) | pKa (base)        | fu,p               | Observed CLr (mL/min) | Mean predicted CLr (mL/min) | Net reabsorbed (R) or secreted (S) | Reported apparent permeability value of each drug from individual primary sources (10 <sup>6</sup> cm/s) |             |                      |               |              |         |                 |                |          |           |               |                |
|----------------------|------------|------------|-------------------|--------------------|-----------------------|-----------------------------|------------------------------------|----------------------------------------------------------------------------------------------------------|-------------|----------------------|---------------|--------------|---------|-----------------|----------------|----------|-----------|---------------|----------------|
|                      |            |            |                   |                    |                       |                             |                                    | Irvine 1998 <sup>g</sup>                                                                                 | Irvine 1998 | Di 2001 <sup>g</sup> | Scotcher 2016 | Alsensz 2003 | Li 2007 | Yazdaniyan 1998 | Artursson 1991 | Yee 1997 | Gres 1998 | Hovgaard 1995 | Yamashita 2000 |
| Acetaminophen        | Neutral    |            |                   | 0.81 <sup>a</sup>  | 11.5 <sup>a</sup>     | 14.11                       | R                                  | 35                                                                                                       | 100         | -                    | -             | -            | -       | -               | -              | -        | -         | -             | 23.7           |
| Betamethasone        | Neutral    |            |                   | 0.36 <sup>a</sup>  | 9.5 <sup>a</sup>      | 9.42                        | R                                  | -                                                                                                        | -           | -                    | 26.5          | -            | -       | -               | -              | -        | -         | -             | -              |
| Dapsone              | Neutral    |            |                   | 0.27 <sup>a</sup>  | 5.5 <sup>a</sup>      | 3.24                        | R                                  | -                                                                                                        | -           | -                    | 49.7          | -            | -       | -               | -              | -        | -         | -             | -              |
| Dexamethasone        | Neutral    |            |                   | 0.32 <sup>b</sup>  | 6.3 <sup>b</sup>      | 13.37                       | R                                  | 20                                                                                                       | 40          | -                    | -             | -            | 12.5    | 12.2            | 12.50          | 23.40    | -         | -             | 12.1           |
| Fluconazole          | Neutral    |            |                   | 0.86 <sup>a</sup>  | 15.7 <sup>a</sup>     | 17.29                       | R                                  | -                                                                                                        | -           | -                    | 36.3          | -            | -       | -               | -              | 29.80    | -         | -             | -              |
| Levetiracetam        | Neutral    |            |                   | 0.9 <sup>a</sup>   | 39.4 <sup>a</sup>     | 38.72                       | R                                  | -                                                                                                        | -           | -                    | 15.7          | -            | -       | -               | -              | -        | -         | -             | -              |
| Linezolid            | Neutral    |            |                   | 0.78 <sup>a</sup>  | 39.5 <sup>a</sup>     | 13.85                       | R                                  | -                                                                                                        | -           | -                    | 36.1          | -            | -       | -               | -              | -        | -         | -             | -              |
| Metronidazole        | Neutral    |            |                   | 0.98 <sup>a</sup>  | 9.6 <sup>a</sup>      | 8.04                        | R                                  | -                                                                                                        | -           | -                    | 64.7          | -            | -       | -               | -              | -        | -         | -             | -              |
| Ribavirin            | Neutral    |            |                   | 1 <sup>a</sup>     | 109.9 <sup>a</sup>    | 106.44                      | R                                  | -                                                                                                        | -           | -                    | 1.55          | -            | -       | -               | -              | -        | -         | -             | -              |
| Topiramate           | Neutral    |            |                   | 0.87 <sup>a</sup>  | 15.1 <sup>a</sup>     | 11.19                       | R                                  | -                                                                                                        | -           | -                    | 46.2          | -            | -       | -               | -              | -        | -         | -             | -              |
| Voriconazole         | Neutral    |            |                   | 0.42 <sup>a</sup>  | 1.57 <sup>a</sup>     | 2.12                        | R                                  | -                                                                                                        | -           | -                    | 96.5          | -            | -       | -               | -              | -        | -         | -             | -              |
| Atenolol             | Base       | 9.67       | 0.97 <sup>a</sup> | 145.3 <sup>a</sup> | 114.33                | 114.33                      | S                                  | 1.8                                                                                                      | 3.3         | 1.31                 | 0.256         | 1.73         | 1.6     | 0.53            | 0.20           | -        | 1.16      | -             | 0.4            |
| Betaxolol            | Base       | 9.67       | 0.45 <sup>a</sup> | 49.6 <sup>a</sup>  | 26.31                 | 26.31                       | R                                  | -                                                                                                        | -           | -                    | 20            | -            | -       | -               | -              | -        | -         | 48.50         | -              |
| Desipramine          | Base       | 10.02      | 0.13 <sup>a</sup> | 28.6 <sup>a</sup>  | 9.37                  | 9.37                        | S                                  | -                                                                                                        | -           | -                    | -             | 43           | -       | 24.4            | -              | 21.60    | -         | -             | -              |
| Imipramine           | Base       | 9.17       | 0.13 <sup>a</sup> | 6.8 <sup>a</sup>   | 5.41                  | 5.41                        | R                                  | -                                                                                                        | -           | -                    | 33.4          | -            | -       | -               | -              | 14.10    | -         | -             | -              |
| Lamotrigine          | Base       | 5.87       | 0.45 <sup>a</sup> | 2.5 <sup>a</sup>   | 2.83                  | 2.83                        | R                                  | 88                                                                                                       | 110         | -                    | -             | -            | -       | -               | -              | -        | -         | -             | -              |
| Metoprolol           | Base       | 9.7        | 0.87 <sup>a</sup> | 109.6 <sup>a</sup> | 69.96                 | 69.96                       | S                                  | 150                                                                                                      | 140         | 24.6                 | 17            | 31.77        | 33.2    | 23.7            | 27.00          | -        | 18.00     | -             | -              |
| Midazolam            | Base       | 6.57       | 0.05 <sup>c</sup> | 0.55 <sup>c</sup>  | 0.79                  | 0.79                        | R                                  | -                                                                                                        | -           | -                    | -             | -            | -       | -               | -              | -        | -         | -             | 69.9           |
| Nadolol              | Base       | 9.76       | 0.7 <sup>f</sup>  | 126 <sup>d</sup>   | 82.77                 | 82.77                       | S                                  | 1.4                                                                                                      | 0.39        | 0.83                 | -             | -            | 0.6     | 3.88            | -              | -        | -         | -             | 0.33           |
| Ondansetron          | Base       | 7.34       | 0.27 <sup>b</sup> | 20.7 <sup>b</sup>  | 7.05                  | 7.05                        | R                                  | 110                                                                                                      | 110         | -                    | -             | -            | -       | -               | -              | -        | -         | -             | -              |
| Oxprenolol           | Base       | 9.67       | 0.14 <sup>a</sup> | 9.35 <sup>a</sup>  | 6.71                  | 6.71                        | R                                  | 130                                                                                                      | 160         | -                    | 30            | -            | -       | -               | -              | -        | -         | 65.50         | -              |
| Trimethoprim         | Base       | 7.16       | 0.49 <sup>a</sup> | 78.2 <sup>a</sup>  | 21.93                 | 21.93                       | S                                  | 52                                                                                                       | 87          | 17.9                 | -             | -            | -       | -               | -              | -        | -         | -             | -              |
| Verapamil            | Base       | 9.68       | 0.16 <sup>a</sup> | 25.6 <sup>a</sup>  | 9.58                  | 9.58                        | S                                  | -                                                                                                        | -           | 7.48                 | 20.9          | 44.67        | 45.7    | -               | -              | -        | -         | -             | -              |
| Acetylsalicylic Acid | Acid       | 3.41       | 0.51 <sup>b</sup> | 9.1 <sup>b</sup>   | 18.03                 | 18.03                       | R                                  | 7.4                                                                                                      | 2.2         | -                    | -             | -            | -       | 9.09            | 2.4            | 30.7     | -         | -             | -              |
| Cefuroxime           | Acid       | 3.15       | 0.67 <sup>b</sup> | 127.4 <sup>b</sup> | 73.30                 | 73.30                       | S                                  | 0.16                                                                                                     | 0.38        | -                    | -             | -            | -       | -               | -              | -        | -         | -             | -              |
| Chloramphenicol      | Acid       | 7.49       | 0.34 <sup>b</sup> | 16.8 <sup>b</sup>  | 11.70                 | 11.70                       | R                                  | -                                                                                                        | -           | -                    | -             | -            | -       | -               | -              | 20.60    | -         | -             | -              |
| Chlorpropamide       | Acid       | 4.33       | 0.05 <sup>a</sup> | 0.6 <sup>a</sup>   | 0.36                  | 0.36                        | R                                  | -                                                                                                        | -           | -                    | 88.1          | -            | -       | -               | -              | -        | -         | -             | -              |
| Ibuprofen            | Acid       | 4.85       | 0.01 <sup>c</sup> | 0.574 <sup>d</sup> | 0.23                  | 0.23                        | R                                  | -                                                                                                        | -           | -                    | -             | -            | -       | -               | -              | 52.50    | -         | -             | -              |
| Probenecid           | Acid       | 3.53       | 0.09 <sup>a</sup> | 0.5 <sup>a</sup>   | 0.70                  | 0.70                        | R                                  | -                                                                                                        | -           | -                    | 84.5          | -            | -       | -               | -              | -        | -         | -             | -              |
| Propylthiouracil     | Acid       | 8.09       | 0.16 <sup>a</sup> | 3.2 <sup>a</sup>   | 1.15                  | 1.15                        | R                                  | 41                                                                                                       | 96          | -                    | 80.8          | -            | -       | -               | -              | -        | -         | -             | -              |
| Sulfamethoxazole     | Acid       | 6.16       | 0.35 <sup>a</sup> | 4.5 <sup>a</sup>   | 7.54                  | 7.54                        | R                                  | -                                                                                                        | -           | -                    | 41.7          | -            | -       | -               | -              | -        | -         | -             | -              |
| Theophylline         | Acid       | 7.82       | 0.52 <sup>a</sup> | 5.5 <sup>a</sup>   | 9.18                  | 9.18                        | R                                  | -                                                                                                        | -           | 23.1                 | 65.1          | -            | 22.6    | -               | -              | -        | -         | -             | 25             |
| Amoxicillin          | Zwitterion | 3.23       | 7.43              | 0.83 <sup>a</sup>  | 167 <sup>a</sup>      | 97.75                       | S                                  | 0.24                                                                                                     | 0.021       | -                    | -             | 0.01         | -       | -               | -              | -        | 0.33      | -             | -              |
| Ampicillin           | Zwitterion | 3.24       | 7.44              | 0.8 <sup>a</sup>   | 163.6 <sup>a</sup>    | 95.03                       | S                                  | -                                                                                                        | -           | -                    | -             | -            | -       | -               | -              | -        | -         | -             | 0.081          |
| Difloxacin           | Zwitterion | 5.81       | 7.39              | 0.62 <sup>a</sup>  | 4.5 <sup>a</sup>      | 3.32                        | R                                  | -                                                                                                        | -           | -                    | 74.6          | -            | -       | -               | -              | -        | -         | -             | -              |
| Enalaprilat          | Zwitterion | 3.13       | 7.83              | 0.61 <sup>b</sup>  | 112 <sup>b</sup>      | 61.17                       | S                                  | -                                                                                                        | -           | -                    | -             | 1.85         | -       | -               | -              | -        | -         | -             | -              |
| Gabapentin           | Zwitterion | 4.63       | 9.91              | 0.97 <sup>a</sup>  | 95.1 <sup>a</sup>     | 113.30                      | R                                  | 0.36                                                                                                     | 0.01        | -                    | 0.67          | -            | -       | -               | -              | -        | -         | -             | -              |
| Labetalol            | Zwitterion | 8.1        | 9.8               | 0.49 <sup>b</sup>  | 64.4 <sup>b</sup>     | 43.06                       | S                                  | 25                                                                                                       | 76          | 7.34                 | -             | -            | -       | 9.31            | -              | -        | -         | -             | -              |
| Lisinopril           | Zwitterion | 3.17       | 10.2              | 0.99 <sup>b</sup>  | 84 <sup>b</sup>       | 114.55                      | R                                  | 0.18                                                                                                     | 0.22        | 0.23                 | -             | 1.27         | -       | -               | -              | -        | -         | -             | -              |
| Melagatran           | Zwitterion | 2.12       | 11.62             | 0.93 <sup>a</sup>  | 113.7 <sup>a</sup>    | 110.34                      | S                                  | -                                                                                                        | -           | -                    | 0.145         | -            | -       | -               | -              | -        | -         | -             | -              |
| Methyl dopa          | Zwitterion | 1.73       | 9.85              | 0.84 <sup>b</sup>  | 147 <sup>b</sup>      | 99.62                       | S                                  | -                                                                                                        | -           | -                    | -             | 0.15         | -       | -               | -              | -        | -         | -             | -              |
| Oxytetracycline      | Zwitterion | 0.24       | 7.75              | 0.77 <sup>a</sup>  | 90.8 <sup>a</sup>     | 86.67                       | R                                  | -                                                                                                        | -           | -                    | 0.85          | -            | -       | -               | -              | -        | -         | -             | -              |
| Pefloxacin           | Zwitterion | 5.66       | 6.47              | 0.75 <sup>a</sup>  | 12.9 <sup>a</sup>     | 6.34                        | R                                  | -                                                                                                        | -           | -                    | 63.7          | -            | -       | -               | -              | -        | -         | -             | -              |
| Terbutaline          | Zwitterion | 8.86       | 9.76              | 0.74 <sup>b</sup>  | 154 <sup>b</sup>      | 87.86                       | S                                  | 1                                                                                                        | 0.41        | -                    | -             | 1.71         | 0.8     | 0.47            | 0.38           | -        | 1.04      | -             | 0.12           |
| Tetracycline         | Zwitterion | -2.2       | 8.24              | 0.76 <sup>a</sup>  | 86.4 <sup>a</sup>     | 83.83                       | R                                  | -                                                                                                        | -           | -                    | 1.1           | -            | -       | -               | -              | -        | -         | -             | -              |
| Trovafoxacin         | Zwitterion | 5.41       | 9.44              | 0.31 <sup>a</sup>  | 12.6 <sup>a</sup>     | 6.79                        | R                                  | -                                                                                                        | -           | -                    | -             | -            | -       | -               | -              | 30.23    | -         | -             | -              |

<sup>a</sup>CLr value is obtained from Scotcher 2016; <sup>b</sup>CLr value is obtained from Ito 2013; <sup>c</sup>CLr value is obtained from Bjelland 2012; <sup>d</sup>CLr value is obtained from Varma 2009; <sup>e</sup>Data is obtained from Zhang 2012; <sup>f</sup>Data is obtained from FDA drug label;

<sup>g</sup>Permeability value is obtained from MDCK cell line; otherwise Caco-2 cell line

Drug is defined as net reabsorbed (R) when observed CLr < unbound filtration, net secreted (S) when observed CLr > unbound filtration
